# Supplementary material
Source: PubMed Central journal article supplement (PMC6586141)
Supplement: nesmith_et_al_hmg_revisedsupplementals_ddz053.pdf [file nesmith_et_al_hmg_revisedsupplementals_ddz053.pdf]

1 **SUPPLEMENTALS**

2 **Fig S1. Classifying phenotypic defects in *alms1*<sup>-/-</sup> zebrafish.**

3 A) Zebrafish *alms1* gene expression in adult fish of indicated genotype. Statistics, One-Way  
4 ANOVA. (B) Quantification of cardiac edema over time in *alms1*<sup>+/+</sup> (n=30) and *alms1*<sup>-/-</sup> (n=69)  
5 larvae. Note the lack of change in percentage over time. (C) Thickness of overall retinal tissue  
6 and photoreceptor layer in 6-month-old adult *alms1*<sup>+/+</sup> (n=4) and *alms1*<sup>-/-</sup> (n=4) animals.  
7 Statistics, One-Way ANOVA. (D) Total fat consumed as assessed by fluorescence per 20 larvae  
8 in *alms1*<sup>+/+</sup> (n=6) and *alms1*<sup>-/-</sup> (n=7) larvae at 7 dpf. (E) cDNA levels of *Alms1* in cultured MIN6  
9  $\beta$ -cells in control and si-*Alms1* conditions. Statistics, two-tailed Student's t-test with Welch's  
10 Correction. Where indicated, \*\* p <0.01, \*\*\*\* p<0.0001, NS not significant.

11

12 **Fig S2. ConsensusPath DB analysis of down-regulated and up-regulated genes in *alms1*<sup>-/-</sup>  $\beta$ -**  
13 **cell enriched populations.**

14 Nodes particular interest from down-regulated (A) and up-regulated (B) genes found to be  
15 differentially expressed genes between  $\beta$ -cells isolated from *alms1*<sup>+/+</sup> and *alms1*<sup>-/-</sup> zebrafish.  
16 Green highlight in B, pancreatic secretion and diabetes-related pathway nodes. (C) Legend  
17 indicating scale of pathway components in A and B.

18

19 **Table S1. Over-abundant Up-regulated Genes in *alms1*<sup>-/-</sup>  $\beta$ -cell enriched populations as**  
20 **identified by Gene Ontology analysis.** All categories significantly enriched over 3-fold are  
21 shown. Gene Ontology defined biological process, fold enrichment and p-value.

22

23 **Table S2. Over-abundant Down-regulated Genes in *alms1*<sup>-/-</sup> β-cell enriched populations as**  
24 **identified by Gene Ontology analysis.** All categories significantly enriched over 3-fold are  
25 shown. Gene Ontology defined biological process, fold enrichment and p-value.

26

27 FIG S1.

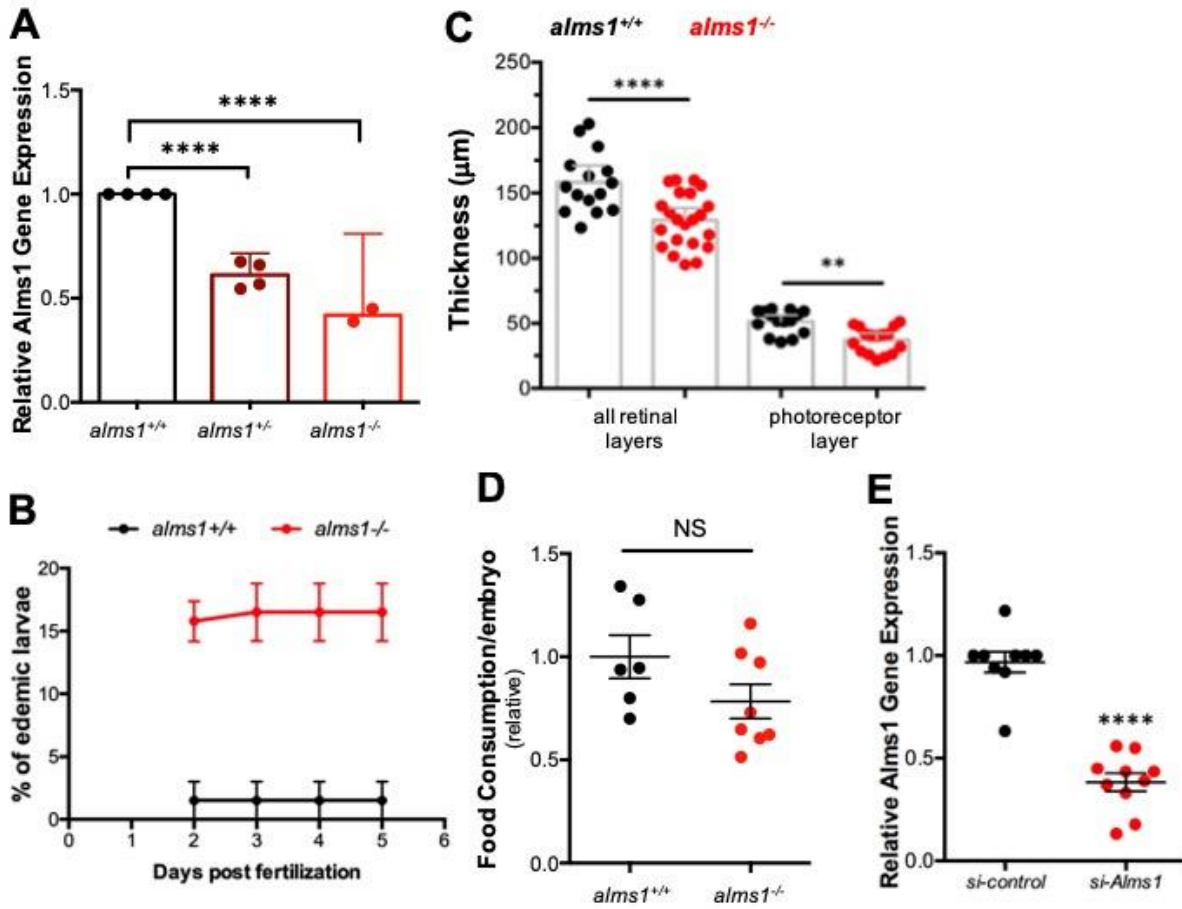

28

29

30 **FIG S2.**

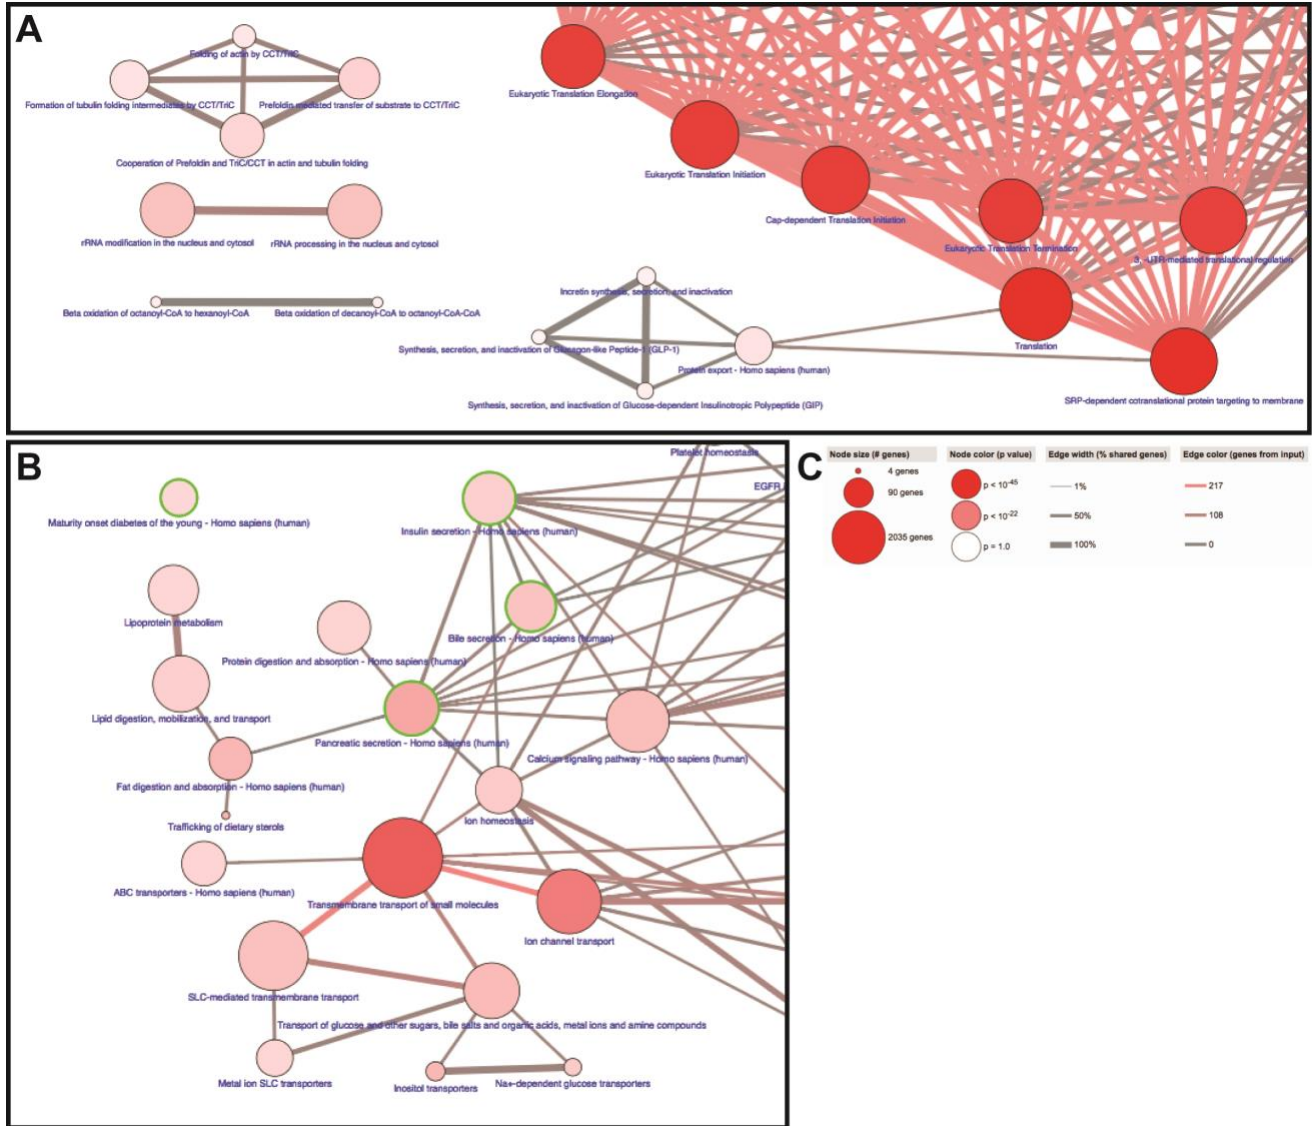

31

32

33 **Table S1.**

| <b>GO Biological Process</b>                                              | <b>Fold Enrichment</b> | <b>P-value</b> |
|---------------------------------------------------------------------------|------------------------|----------------|
| striated muscle myosin thick filament assembly                            | 9.68                   | 6.75E-06       |
| myosin filament assembly                                                  | 9.68                   | 6.75E-06       |
| myosin filament organization                                              | 9.68                   | 6.75E-06       |
| membrane depolarization                                                   | 7.33                   | 5.09E-06       |
| membrane depolarization during action potential                           | 7.33                   | 5.09E-06       |
| response to alkaloid                                                      | 7.15                   | 2.27E-05       |
| action potential                                                          | 6.98                   | 3.26E-06       |
| adenylate cyclase-inhibiting G-protein coupled receptor signaling pathway | 5.77                   | 1.34E-04       |
| regulation of cation channel activity                                     | 5.44                   | 2.94E-04       |
| calcium ion transmembrane transport                                       | 5.35                   | 1.87E-13       |
| calcium ion transport                                                     | 5.18                   | 9.93E-17       |
| regulation of membrane potential                                          | 5.18                   | 5.53E-13       |
| sarcomere organization                                                    | 4.7                    | 4.44E-03       |
| sensory perception of mechanical stimulus                                 | 4.7                    | 4.44E-03       |
| regulation of calcium ion-dependent exocytosis                            | 4.7                    | 4.44E-03       |
| regulation of ion transmembrane transporter activity                      | 4.54                   | 3.16E-03       |
| striated muscle contraction                                               | 4.51                   | 1.59E-02       |
| calcium ion-regulated exocytosis of neurotransmitter                      | 4.42                   | 4.13E-02       |
| divalent metal ion transport                                              | 4.41                   | 6.46E-15       |
| divalent inorganic cation transport                                       | 4.41                   | 6.46E-15       |
| regulation of exocytosis                                                  | 4.31                   | 1.61E-04       |
| multicellular organismal signaling                                        | 4.28                   | 2.84E-02       |
| regulation of transmembrane transporter activity                          | 4.23                   | 7.55E-03       |
| chloride transport                                                        | 4.12                   | 2.65E-03       |
| regulation of ion transmembrane transport                                 | 4.11                   | 3.55E-12       |
| regulation of regulated secretory pathway                                 | 4.06                   | 2.52E-02       |
| regulation of transmembrane transport                                     | 4.03                   | 7.78E-12       |
| regulation of transporter activity                                        | 3.97                   | 1.68E-02       |
| inorganic anion transport                                                 | 3.91                   | 2.13E-04       |
| detection of abiotic stimulus                                             | 3.91                   | 7.93E-04       |
| detection of external stimulus                                            | 3.91                   | 7.93E-04       |
| regulation of cation transmembrane transport                              | 3.89                   | 2.17E-02       |
| potassium ion transport                                                   | 3.89                   | 1.01E-10       |
| regulation of ion transport                                               | 3.79                   | 3.76E-11       |
| metal ion transport                                                       | 3.57                   | 7.65E-26       |
| calcium ion regulated exocytosis                                          | 3.51                   | 2.32E-02       |
| cellular component assembly involved in morphogenesis                     | 3.49                   | 8.82E-04       |
| cation transmembrane transport                                            | 3.38                   | 2.14E-16       |

|                                                                           |      |          |
|---------------------------------------------------------------------------|------|----------|
| myofibril assembly                                                        | 3.36 | 4.90E-03 |
| signal release                                                            | 3.33 | 9.36E-03 |
| regulation of secretion by cell                                           | 3.27 | 1.58E-03 |
| ion transmembrane transport                                               | 3.19 | 3.32E-18 |
| adenylate cyclase-modulating G-protein coupled receptor signaling pathway | 3.16 | 1.79E-03 |
| potassium ion transmembrane transport                                     | 3.15 | 8.28E-03 |
| cellular potassium ion transport                                          | 3.15 | 8.28E-03 |
| inorganic cation transmembrane transport                                  | 3.13 | 1.37E-11 |
| cation transport                                                          | 3.11 | 9.43E-26 |
| inorganic ion transmembrane transport                                     | 3.09 | 3.94E-12 |
| ion transport                                                             | 3.08 | 1.52E-43 |
| regulation of secretion                                                   | 3.07 | 4.85E-03 |

34

35 **Table S2.**

| <b>GO Biological Process</b>                           | <b>Fold Enrichment</b> | <b>P-value</b> |
|--------------------------------------------------------|------------------------|----------------|
| cytoplasmic translation                                | 4.32                   | 4.47E-06       |
| maturation of LSU-rRNA                                 | 4.23                   | 7.85E-03       |
| ribosomal large subunit biogenesis                     | 4.15                   | 2.08E-08       |
| ribosome assembly                                      | 3.77                   | 2.27E-04       |
| mitochondrial ATP synthesis coupled electron transport | 3.55                   | 2.06E-03       |
| translational initiation                               | 3.53                   | 4.93E-07       |
| ribosomal small subunit biogenesis                     | 3.43                   | 9.31E-06       |
| ribonucleoprotein complex assembly                     | 3.37                   | 4.02E-13       |
| ATP synthesis coupled electron transport               | 3.34                   | 3.21E-03       |
| ribosome biogenesis                                    | 3.32                   | 1.14E-20       |
| translation                                            | 3.3                    | 2.45E-35       |
| ribonucleoprotein complex biogenesis                   | 3.27                   | 5.29E-29       |
| oxidative phosphorylation                              | 3.26                   | 4.82E-03       |
| peptide biosynthetic process                           | 3.26                   | 1.21E-34       |
| maturation of SSU-rRNA                                 | 3.18                   | 7.14E-03       |
| rRNA processing                                        | 3.17                   | 4.20E-12       |
| rRNA metabolic process                                 | 3.14                   | 3.35E-13       |
| ribonucleoprotein complex subunit organization         | 3.12                   | 1.35E-11       |
| amide biosynthetic process                             | 3.02                   | 4.93E-32       |

36
